# Supplementary material for: Factors Associated with Changes in Retinal Layers Following Acute Optic Neuritis: A Longitudinal Study Using Optical Coherence Tomography
Source: PubMed Central journal article supplement (PMC7760276; doi:10.3390/jcm9123857), 2020-11-27
Supplement: jcm-09-03857-s001.pdf [file jcm-09-03857-s001.pdf]

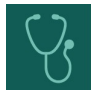

### Supplementary Materials

For the subanalysis considering the low initial visual acuity and NMO-IgG, it was divided into 4 groups as follows; Group 1, NMO-IgG (-) and LogMAR < 1; Group 2, NMO-IgG (-) and LogMAR ≥ 1; Group 3, NMO-IgG (+) and LogMAR < 1; Group 4, NMO-IgG (+) and LogMAR ≥ 1. The six tables show the results of the linear regression analysis using GEE between the two groups.

**Table S1.** Changes of thickness in each retinal layer between group 1 and 2.

| Retinal layer | Difference in thickness                                           |           |                | Changes in thickness difference                                   |           |                |
|---------------|-------------------------------------------------------------------|-----------|----------------|-------------------------------------------------------------------|-----------|----------------|
|               | Between NMO-IgG (-) and LogMAR < 1 vs. NMO-IgG (-) and LogMAR ≥ 1 |           |                | between NMO-IgG (-) and LogMAR < 1 vs. NMO-IgG (-) and LogMAR ≥ 1 |           |                |
|               |                                                                   | $\beta$   | <i>p</i> value |                                                                   | $\beta$   | <i>p</i> value |
| NFL           | Baseline                                                          | -0.5(1.9) | 1.000          | $\Delta 2-\Delta 1$                                               | -2.8(1.8) | 0.364          |
|               | 2-5 months                                                        | -3.3(2.2) | 0.383          | $\Delta 3-\Delta 2$                                               | -1(0.9)   | 0.807          |
|               | 6-18 months                                                       | -4.4(2)   | 0.098          | $\Delta 3-\Delta 1$                                               | -3.9(1.7) | 0.075          |
| GCL           | Baseline                                                          | -2.1(2.6) | 1.000          | $\Delta 2-\Delta 1$                                               | -4.3(1.5) | <b>0.013</b>   |
|               | 2-5 months                                                        | -6.4(3.1) | 0.114          | $\Delta 3-\Delta 2$                                               | 0.1(1)    | 1.000          |
|               | 6-18 months                                                       | -6.3(3.2) | 0.144          | $\Delta 3-\Delta 1$                                               | -4.2(1.8) | 0.053          |
| IPL           | Baseline                                                          | -2.2(1.6) | 0.504          | $\Delta 2-\Delta 1$                                               | -3(0.9)   | <b>0.003</b>   |
|               | 2-5 months                                                        | -5.2(1.8) | <b>0.012</b>   | $\Delta 3-\Delta 2$                                               | -0.5(1)   | 1.000          |
|               | 6-18 months                                                       | -5.7(1.8) | <b>0.006</b>   | $\Delta 3-\Delta 1$                                               | -3.5(1.2) | <b>0.013</b>   |
| INL           | Baseline                                                          | 0.1(1)    | 1.000          | $\Delta 2-\Delta 1$                                               | 0.4(0.5)  | 1.000          |
|               | 2-5 months                                                        | 0.5(0.9)  | 1.000          | $\Delta 3-\Delta 2$                                               | 0(0.5)    | 1.000          |
|               | 6-18 months                                                       | 0.5(0.9)  | 1.000          | $\Delta 3-\Delta 1$                                               | 0.4(0.7)  | 1.000          |
| OPL           | Baseline                                                          | 2.4(1.2)  | 0.148          | $\Delta 2-\Delta 1$                                               | -1(1)     | 0.915          |
|               | 2-5 months                                                        | 1.3(1.5)  | 1.000          | $\Delta 3-\Delta 2$                                               | -1.2(0.7) | 0.31           |
|               | 6-18 months                                                       | 0.1(1.2)  | 1.000          | $\Delta 3-\Delta 1$                                               | -2.2(0.9) | <b>0.034</b>   |
| ONL           | Baseline                                                          | -0.3(4.1) | 1.000          | $\Delta 2-\Delta 1$                                               | 1.3(1.8)  | 1.000          |
|               | 2-5 months                                                        | 1(4.3)    | 1.000          | $\Delta 3-\Delta 2$                                               | 1.8(1.2)  | 0.378          |
|               | 6-18 months                                                       | 2.8(4.3)  | 1.000          | $\Delta 3-\Delta 1$                                               | 3.1(1.4)  | 0.079          |
| ORL           | Baseline                                                          | -0.4(0.7) | 1.000          | $\Delta 2-\Delta 1$                                               | 0.8(0.9)  | 1.000          |
|               | 2-5 months                                                        | 0.4(1)    | 1.000          | $\Delta 3-\Delta 2$                                               | 0.1(0.7)  | 1.000          |
|               | 6-18 months                                                       | 0.5(1)    | 1.000          | $\Delta 3-\Delta 1$                                               | 0.9(0.8)  | 0.846          |

**Table S2.** Changes of thickness in each retinal layer between group 3 and 4.

| Retinal layer | Difference in thickness                                           |           |                  | Changes in thickness difference                                   |           |                |
|---------------|-------------------------------------------------------------------|-----------|------------------|-------------------------------------------------------------------|-----------|----------------|
|               | Between NMO-IgG (+) and LogMAR ≥ 1 vs. NMO-IgG (+) and LogMAR < 1 |           |                  | between NMO-IgG (+) and LogMAR ≥ 1 vs. NMO-IgG (+) and LogMAR < 1 |           |                |
|               |                                                                   | $\beta$   | <i>p</i> value   |                                                                   | $\beta$   | <i>p</i> value |
| NFL           | Baseline                                                          | -2.6(1.9) | 0.493            | $\Delta 2-\Delta 1$                                               | -2.6(2.3) | 0.765          |
|               | 2-5 months                                                        | -5.3(1.4) | <b>0.001</b>     | $\Delta 3-\Delta 2$                                               | -0.3(1.4) | 1.000          |
|               | 6-18 months                                                       | -5.6(1.3) | <b>&lt;0.001</b> | $\Delta 3-\Delta 1$                                               | -2.9(2.3) | 0.582          |
| GCL           | Baseline                                                          | -1.5(2.6) | 1.000            | $\Delta 2-\Delta 1$                                               | -6.7(2.6) | <b>0.031</b>   |
|               | 2-5 months                                                        | -8.2(2.1) | <b>&lt;0.001</b> | $\Delta 3-\Delta 2$                                               | -1.1(1.4) | 1.000          |
|               | 6-18 months                                                       | -9.3(2.6) | <b>0.001</b>     | $\Delta 3-\Delta 1$                                               | -7.8(3.1) | <b>0.039</b>   |
| IPL           | Baseline                                                          | -1.2(2)   | 1.000            | $\Delta 2-\Delta 1$                                               | -3.1(2)   | 0.363          |
|               | 2-5 months                                                        | -4.3(1.8) | <b>0.041</b>     | $\Delta 3-\Delta 2$                                               | -1.6(1)   | 0.369          |
|               | 6-18 months                                                       | -5.9(1.4) | <b>&lt;0.001</b> | $\Delta 3-\Delta 1$                                               | -4.7(1.9) | <b>0.048</b>   |
| INL           | Baseline                                                          | -1.9(1.3) | 0.419            | $\Delta 2-\Delta 1$                                               | -0.1(1.4) | 1.000          |

|     |             |           |       |                     |           |       |
|-----|-------------|-----------|-------|---------------------|-----------|-------|
|     | 2–5 months  | −2(1.8)   | 0.738 | $\Delta 3-\Delta 2$ | 0.6(0.9)  | 1.000 |
|     | 6–18 months | −1.4(1.6) | 1.000 | $\Delta 3-\Delta 1$ | 0.5(0.9)  | 1.000 |
| OPL | Baseline    | 0(1.2)    | 1.000 | $\Delta 2-\Delta 1$ | −1.1(0.8) | 0.483 |
|     | 2–5 months  | −1.1(1.2) | 1.000 | $\Delta 3-\Delta 2$ | 0.6(0.7)  | 1.000 |
|     | 6–18 months | −0.5(1.2) | 1.000 | $\Delta 3-\Delta 1$ | −0.5(0.8) | 1.000 |
| ONL | Baseline    | −3.6(3.7) | 0.993 | $\Delta 2-\Delta 1$ | 1.6(2.1)  | 1.000 |
|     | 2–5 months  | −2(3.5)   | 1.000 | $\Delta 3-\Delta 2$ | 1.5(1.2)  | 0.681 |
|     | 6–18 months | −0.5(3)   | 1.000 | $\Delta 3-\Delta 1$ | 3(1.8)    | 0.288 |
| ORL | Baseline    | −1.6(1)   | 0.339 | $\Delta 2-\Delta 1$ | 1.5(1.1)  | 0.528 |
|     | 2–5 months  | −0.1(1)   | 1.000 | $\Delta 3-\Delta 2$ | −0.6(0.9) | 1.000 |
|     | 6–18 months | −0.7(0.9) | 1.000 | $\Delta 3-\Delta 1$ | 0.9(1.2)  | 1.000 |

**Table S3.** Changes of thickness in each retinal layer between group 1 and 3.

| Retinal layer | Difference in thickness                                           |           |                | Changes in thickness difference                                   |           |                |
|---------------|-------------------------------------------------------------------|-----------|----------------|-------------------------------------------------------------------|-----------|----------------|
|               | Between NMO-IgG (+) and LogMAR < 1 vs. NMO-IgG (−) and LogMAR < 1 |           |                | between NMO-IgG (+) and LogMAR < 1 vs. NMO-IgG (−) and LogMAR < 1 |           |                |
|               |                                                                   | $\beta$   | <i>p</i> value |                                                                   | $\beta$   | <i>p</i> value |
| NFL           | Baseline                                                          | 1.6(1.6)  | 0.996          | $\Delta 2-\Delta 1$                                               | −2.9(2)   | 0.487          |
|               | 2–5 months                                                        | −1.3(1.3) | 0.975          | $\Delta 3-\Delta 2$                                               | −0.2(0.8) | 1.000          |
|               | 6–18 months                                                       | −1.4(1.5) | 0.984          | $\Delta 3-\Delta 1$                                               | −3(2)     | 0.394          |
| GCL           | Baseline                                                          | 0(2)      | 1.000          | $\Delta 2-\Delta 1$                                               | −2.7(1.6) | 0.278          |
|               | 2–5 months                                                        | −2.7(2.2) | 0.66           | $\Delta 3-\Delta 2$                                               | −0.8(0.8) | 0.987          |
|               | 6–18 months                                                       | −3.5(2.4) | 0.471          | $\Delta 3-\Delta 1$                                               | −3.5(2)   | 0.253          |
| IPL           | Baseline                                                          | 0.6(1.5)  | 1.000          | $\Delta 2-\Delta 1$                                               | −2.2(1.2) | 0.238          |
|               | 2–5 months                                                        | −1.6(1.6) | 0.93           | $\Delta 3-\Delta 2$                                               | −0.2(0.8) | 1.000          |
|               | 6–18 months                                                       | −1.8(1.6) | 0.735          | $\Delta 3-\Delta 1$                                               | −2.4(1.4) | 0.268          |
| INL           | Baseline                                                          | 2.6(1.3)  | 0.142          | $\Delta 2-\Delta 1$                                               | −0.1(0.7) | 1.000          |
|               | 2–5 months                                                        | 2.5(1.3)  | 0.165          | $\Delta 3-\Delta 2$                                               | 0.6(0.4)  | 0.402          |
|               | 6–18 months                                                       | 3.1(1.4)  | 0.068          | $\Delta 3-\Delta 1$                                               | 0.6(0.5)  | 0.762          |
| OPL           | Baseline                                                          | 2.2(1)    | 0.097          | $\Delta 2-\Delta 1$                                               | −0.4(0.7) | 1.000          |
|               | 2–5 months                                                        | 1.8(1.3)  | 0.446          | $\Delta 3-\Delta 2$                                               | 0.3(0.7)  | 1.000          |
|               | 6–18 months                                                       | 2.1(1.2)  | 0.246          | $\Delta 3-\Delta 1$                                               | −0.1(0.8) | 1.000          |
| ONL           | Baseline                                                          | 1.1(3.3)  | 1.000          | $\Delta 2-\Delta 1$                                               | 2.6(1.7)  | 0.375          |
|               | 2–5 months                                                        | 3.6(3.1)  | 0.716          | $\Delta 3-\Delta 2$                                               | −2.2(1.2) | 0.198          |
|               | 6–18 months                                                       | 1.5(2.7)  | 1.000          | $\Delta 3-\Delta 1$                                               | 0.4(1.4)  | 1.000          |
| ORL           | Baseline                                                          | 1.5(1)    | 0.329          | $\Delta 2-\Delta 1$                                               | 0.2(0.9)  | 1.000          |
|               | 2–5 months                                                        | 1.8(1)    | 0.244          | $\Delta 3-\Delta 2$                                               | −0.5(0.8) | 1.000          |
|               | 6–18 months                                                       | 1.3(0.7)  | 0.238          | $\Delta 3-\Delta 1$                                               | −0.2(0.8) | 1.000          |

**Table S4.** Changes of thickness in each retinal layer between group 2 and 4.

| Retinal layer | Difference in thickness                                                     |           |                | Changes in thickness difference                                             |           |                |
|---------------|-----------------------------------------------------------------------------|-----------|----------------|-----------------------------------------------------------------------------|-----------|----------------|
|               | Between NMO-IgG (+) and LogMAR $\geq 1$ vs. NMO-IgG (−) and LogMAR $\geq 1$ |           |                | between NMO-IgG (+) and LogMAR $\geq 1$ vs. NMO-IgG (−) and LogMAR $\geq 1$ |           |                |
|               |                                                                             | $\beta$   | <i>p</i> value |                                                                             | $\beta$   | <i>p</i> value |
| NFL           | Baseline                                                                    | −0.6(2.1) | 1.000          | $\Delta 2-\Delta 1$                                                         | −2.7(2.1) | 0.627          |
|               | 2–5 months                                                                  | −3.2(2)   | 0.317          | $\Delta 3-\Delta 2$                                                         | 0.6(1.5)  | 1.000          |
|               | 6–18 months                                                                 | −2.7(1.7) | 0.374          | $\Delta 3-\Delta 1$                                                         | −2.1(2)   | 0.903          |
| GCL           | Baseline                                                                    | 0.6(3)    | 1.000          | $\Delta 2-\Delta 1$                                                         | −5.1(2.6) | 0.142          |
|               | 2–5 months                                                                  | −4.4(2.6) | 0.281          | $\Delta 3-\Delta 2$                                                         | −2(1.6)   | 0.618          |
|               | 6–18 months                                                                 | −6.4(2.8) | 0.07           | $\Delta 3-\Delta 1$                                                         | −7.1(3)   | 0.057          |

|     |             |           |       |                     |           |              |
|-----|-------------|-----------|-------|---------------------|-----------|--------------|
| IPL | Baseline    | 1.6(2.3)  | 1.000 | $\Delta 2-\Delta 1$ | -2.3(1.9) | 0.63         |
|     | 2-5 months  | -0.8(1.9) | 1.000 | $\Delta 3-\Delta 2$ | -1.3(1.2) | 0.846        |
|     | 6-18 months | -2(1.8)   | 0.775 | $\Delta 3-\Delta 1$ | -3.6(1.8) | 0.139        |
| INL | Baseline    | 0.5(1.1)  | 1.000 | $\Delta 2-\Delta 1$ | -0.5(1.3) | 1.000        |
|     | 2-5 months  | 0(1.5)    | 1.000 | $\Delta 3-\Delta 2$ | 1.2(0.9)  | 0.552        |
|     | 6-18 months | 1.2(1.2)  | 0.948 | $\Delta 3-\Delta 1$ | 0.7(1)    | 1.000        |
| OPL | Baseline    | -0.1(1.2) | 1.000 | $\Delta 2-\Delta 1$ | -0.4(1)   | 1.000        |
|     | 2-5 months  | -0.6(1.4) | 1.000 | $\Delta 3-\Delta 2$ | 2.1(0.7)  | <b>0.013</b> |
|     | 6-18 months | 1.5(1.2)  | 0.58  | $\Delta 3-\Delta 1$ | 1.6(0.9)  | 0.215        |
| ONL | Baseline    | -2.2(4.2) | 1.000 | $\Delta 2-\Delta 1$ | 2.9(2.2)  | 0.564        |
|     | 2-5 months  | 0.7(4.2)  | 1.000 | $\Delta 3-\Delta 2$ | -2.5(1.2) | 0.122        |
|     | 6-18 months | -1.8(4.4) | 1.000 | $\Delta 3-\Delta 1$ | 0.4(1.8)  | 1.000        |
| ORL | Baseline    | 0.3(0.9)  | 1.000 | $\Delta 2-\Delta 1$ | 1(1.1)    | 1.000        |
|     | 2-5 months  | 1.3(0.9)  | 0.45  | $\Delta 3-\Delta 2$ | -1.2(0.8) | 0.432        |
|     | 6-18 months | 0.1(1.1)  | 1.000 | $\Delta 3-\Delta 1$ | -0.3(1.2) | 1.000        |

Table S5. Changes of thickness in each retinal layer between group 1 and 4.

| Retinal layer | Difference in thickness                                                     |            |                   | Changes in thickness difference                                             |            |                   |
|---------------|-----------------------------------------------------------------------------|------------|-------------------|-----------------------------------------------------------------------------|------------|-------------------|
|               | Between NMO-IgG (+) and LogMAR $\geq 1$<br>vs. NMO-IgG (-) and LogMAR $< 1$ |            |                   | between NMO-IgG (+) and LogMAR $\geq 1$<br>vs. NMO-IgG (-) and LogMAR $< 1$ |            |                   |
|               |                                                                             | $\beta$    | <i>p</i> value    |                                                                             | $\beta$    | <i>p</i> value    |
| NFL           | Baseline                                                                    | -1.1(1.4)  | 1.000             | $\Delta 2-\Delta 1$                                                         | -5.5(1.3)  | <b>&lt; 0.001</b> |
|               | 2-5 months                                                                  | -6.6(1.2)  | <b>&lt; 0.001</b> | $\Delta 3-\Delta 2$                                                         | -0.5(1.4)  | 1.000             |
|               | 6-18 months                                                                 | -7(1.3)    | <b>&lt; 0.001</b> | $\Delta 3-\Delta 1$                                                         | -6(1.5)    | <b>&lt; 0.001</b> |
| GCL           | Baseline                                                                    | -1.4(2.4)  | 1.000             | $\Delta 2-\Delta 1$                                                         | -9.4(2.3)  | <b>&lt; 0.001</b> |
|               | 2-5 months                                                                  | -10.8(1.9) | <b>&lt; 0.001</b> | $\Delta 3-\Delta 2$                                                         | -1.9(1.3)  | 0.45              |
|               | 6-18 months                                                                 | -12.7(2.2) | <b>&lt; 0.001</b> | $\Delta 3-\Delta 1$                                                         | -11.3(2.8) | <b>&lt; 0.001</b> |
| IPL           | Baseline                                                                    | -0.6(1.9)  | 1.000             | $\Delta 2-\Delta 1$                                                         | -5.3(1.8)  | <b>0.009</b>      |
|               | 2-5 months                                                                  | -5.9(1.7)  | <b>0.002</b>      | $\Delta 3-\Delta 2$                                                         | -1.8(1.1)  | 0.301             |
|               | 6-18 months                                                                 | -7.7(1.3)  | <b>&lt; 0.001</b> | $\Delta 3-\Delta 1$                                                         | -7.1(1.7)  | <b>&lt; 0.001</b> |
| INL           | Baseline                                                                    | 0.7(0.9)   | 1.000             | $\Delta 2-\Delta 1$                                                         | -0.2(1.2)  | 1.000             |
|               | 2-5 months                                                                  | 0.5(1.5)   | 1.000             | $\Delta 3-\Delta 2$                                                         | 1.2(0.9)   | 0.464             |
|               | 6-18 months                                                                 | 1.7(1.2)   | 0.506             | $\Delta 3-\Delta 1$                                                         | 1(0.8)     | 0.594             |
| OPL           | Baseline                                                                    | 2.2(0.9)   | 0.052             | $\Delta 2-\Delta 1$                                                         | -1.5(0.8)  | 0.221             |
|               | 2-5 months                                                                  | 0.8(0.9)   | 1.000             | $\Delta 3-\Delta 2$                                                         | 0.9(0.6)   | 0.396             |
|               | 6-18 months                                                                 | 1.6(0.9)   | 0.196             | $\Delta 3-\Delta 1$                                                         | -0.6(0.8)  | 1.000             |
| ONL           | Baseline                                                                    | -2.5(3.1)  | 1.000             | $\Delta 2-\Delta 1$                                                         | 4.2(1.7)   | <b>0.041</b>      |
|               | 2-5 months                                                                  | 1.6(3.3)   | 1.000             | $\Delta 3-\Delta 2$                                                         | -0.7(0.8)  | 1.000             |
|               | 6-18 months                                                                 | 0.9(3.1)   | 1.000             | $\Delta 3-\Delta 1$                                                         | 3.5(1.6)   | 0.09              |
| ORL           | Baseline                                                                    | -0.1(1)    | 1.000             | $\Delta 2-\Delta 1$                                                         | 1.8(1)     | 0.218             |
|               | 2-5 months                                                                  | 1.7(0.7)   | <b>0.036</b>      | $\Delta 3-\Delta 2$                                                         | -1.1(0.7)  | 0.32              |
|               | 6-18 months                                                                 | 0.6(0.9)   | 1.000             | $\Delta 3-\Delta 1$                                                         | 0.7(1.1)   | 1.000             |

Table S6. Changes of thickness in each retinal layer between group 2 and 3.

| Retinal layer | Difference in thickness                                                     |           |                | Changes in thickness difference                                             |           |                |
|---------------|-----------------------------------------------------------------------------|-----------|----------------|-----------------------------------------------------------------------------|-----------|----------------|
|               | Between NMO-IgG (+) and LogMAR $< 1$<br>vs. NMO-IgG (-) and LogMAR $\geq 1$ |           |                | Between NMO-IgG (+) and LogMAR $< 1$<br>vs. NMO-IgG (-) and LogMAR $\geq 1$ |           |                |
|               |                                                                             | $\beta$   | <i>p</i> value |                                                                             | $\beta$   | <i>p</i> value |
| NFL           | Baseline                                                                    | -2.1(2.3) | 1.000          | $\Delta 2-\Delta 1$                                                         | 0(2.7)    | 1.000          |
|               | 2-5 months                                                                  | -2(2.2)   | 1.000          | $\Delta 3-\Delta 2$                                                         | -0.9(0.9) | 1.000          |

|     |             |           |       |                     |           |              |
|-----|-------------|-----------|-------|---------------------|-----------|--------------|
|     | 6–18 months | −2.9(2)   | 0.447 | $\Delta 3-\Delta 1$ | 0.8(2.4)  | 1.000        |
| GCL | Baseline    | −2.1(2.7) | 1.000 | $\Delta 2-\Delta 1$ | 1.6(1.9)  | 1.000        |
|     | 2–5 months  | −3.7(2.9) | 0.618 | $\Delta 3-\Delta 2$ | 0.9(1.2)  | 1.000        |
|     | 6–18 months | −2.9(3.2) | 1.000 | $\Delta 3-\Delta 1$ | 0.8(2.4)  | 1.000        |
| IPL | Baseline    | −2.8(1.9) | 0.406 | $\Delta 2-\Delta 1$ | 0.8(1.3)  | 1.000        |
|     | 2–5 months  | −3.6(1.9) | 0.162 | $\Delta 3-\Delta 2$ | −0.3(0.9) | 1.000        |
|     | 6–18 months | −3.8(2)   | 0.179 | $\Delta 3-\Delta 1$ | 1.1(1.5)  | 1.000        |
| INL | Baseline    | −2.4(1.5) | 0.302 | $\Delta 2-\Delta 1$ | −0.4(0.7) | 1.000        |
|     | 2–5 months  | −2(1.4)   | 0.462 | $\Delta 3-\Delta 2$ | −0.6(0.5) | 0.693        |
|     | 6–18 months | −2.6(1.4) | 0.177 | $\Delta 3-\Delta 1$ | 0.2(0.8)  | 1.000        |
| OPL | Baseline    | 0.1(1.4)  | 1.000 | $\Delta 2-\Delta 1$ | 0.6(1)    | 1.000        |
|     | 2–5 months  | −0.5(1.7) | 1.000 | $\Delta 3-\Delta 2$ | −1.5(0.8) | 0.226        |
|     | 6–18 months | −2(1.5)   | 0.513 | $\Delta 3-\Delta 1$ | 2.1(0.9)  | 0.066        |
| ONL | Baseline    | −1.4(4.9) | 1.000 | $\Delta 2-\Delta 1$ | 1.3(2.2)  | 1.000        |
|     | 2–5 months  | −2.7(4.7) | 1.000 | $\Delta 3-\Delta 2$ | 4(1.5)    | <b>0.023</b> |
|     | 6–18 months | 1.3(4.6)  | 1.000 | $\Delta 3-\Delta 1$ | −2.7(1.6) | 0.315        |
| ORL | Baseline    | −2(0.9)   | 0.105 | $\Delta 2-\Delta 1$ | −0.6(1)   | 1.000        |
|     | 2–5 months  | −1.4(1.2) | 0.786 | $\Delta 3-\Delta 2$ | 0.6(0.9)  | 1.000        |
|     | 6–18 months | −0.8(1)   | 1.000 | $\Delta 3-\Delta 1$ | −1.2(1)   | 0.693        |

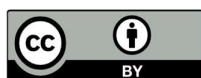

© 2020 by the authors. Licensee MDPI, Basel, Switzerland. This article is an open access article distributed under the terms and conditions of the Creative Commons Attribution (CC BY) license (<http://creativecommons.org/licenses/by/4.0/>).
